# Supplementary material
Source: publisher figshare collection journal article supplement (https://gsapubs.figshare.com/articles/dataset/_/25308946)
Supplement: Supplementary file 1 [file 1]

Condon, D., Schoene, B., Schmitz, M., Schaltegger, U., Ickert, R., Amelin, Y., Augland, L.E., Chamberlain, K.R., Coleman, D.S., Connelly, J.N., Corfu, F., Crowley, J.L., Davies, J.H.F.L., Denyszyn, S.W., Eddy, M.P., Heaman, L.M., Huyskens, M.H., Gaynor, S.P., Kamo, S., Kasbohm, J., Keller, C. B., MacLennan, S.A., McLean, N.M., Noble, S., Ovtcharova, M., Paul, A., Ramezani, J., Rioux, M., Sahy, D., Scoates, J., Szymanowski, D., Tapster, S., Tichomirowa, M., Wall, C., Wotzlaw, J.-F., Yang, C., and Yin, Q.-Z., 2024, Recommendations for the reporting and interpretation of isotope dilution U-Pb geochronological information: GSA Bulletin, <https://doi.org/10.1130/B37321.1>.

## Supplemental Material

**Table S1.** Example data table for U-Pb CA-ID-TIMS isotopic data for a mineral low in common Pb.

**Table S2.** U-Pb ID-TIMS isotopic data for a single mineral grain high in common Pb.
